# Supplementary material for: A Bacteriophage Cocktail Significantly Reduces Listeria monocytogenes without Deleterious Impact on the Commensal Gut Microbiota under Simulated Gastrointestinal Conditions
Source: MDPI journal article supplement (doi:10.3390/v14020190), 2022-01-19
Supplement: s1 [file s1]

## Supplementary materials

**Table S1.** Current bacteriophage composition of the FOP phage preparation.

| Species                          | Strain Source | Origin           | Culture Time [h] | Culture Media |
|----------------------------------|---------------|------------------|------------------|---------------|
| <i>Escherichia coli</i>          | DSM 1058      | Human origin     | 24               | GAM           |
| <i>Streptococcus salivarius</i>  | DSM 20560     | Blood            | 6                | GAM           |
| <i>Streptococcus luteinensis</i> | DSM 15350     | Human origin     | 24               | GAM           |
| <i>Enterococcus faecalis</i>     | DSM 20478     | Human faeces     | 24               | GAM           |
| <i>Bacteroides fragilis</i>      | DSM 2151      | Appendix abscess | 24               | GAM           |
| <i>Veillonella parvula</i>       | DSM 2008      | Human intestine  | 48               | GAM           |
| <i>Flavonifractor plautii</i>    | DSM 6740      | Human faeces     | 48               | GAM           |

GAM = Gifu Anaerobic Medium. Modified from Cieplak et al. 2018.

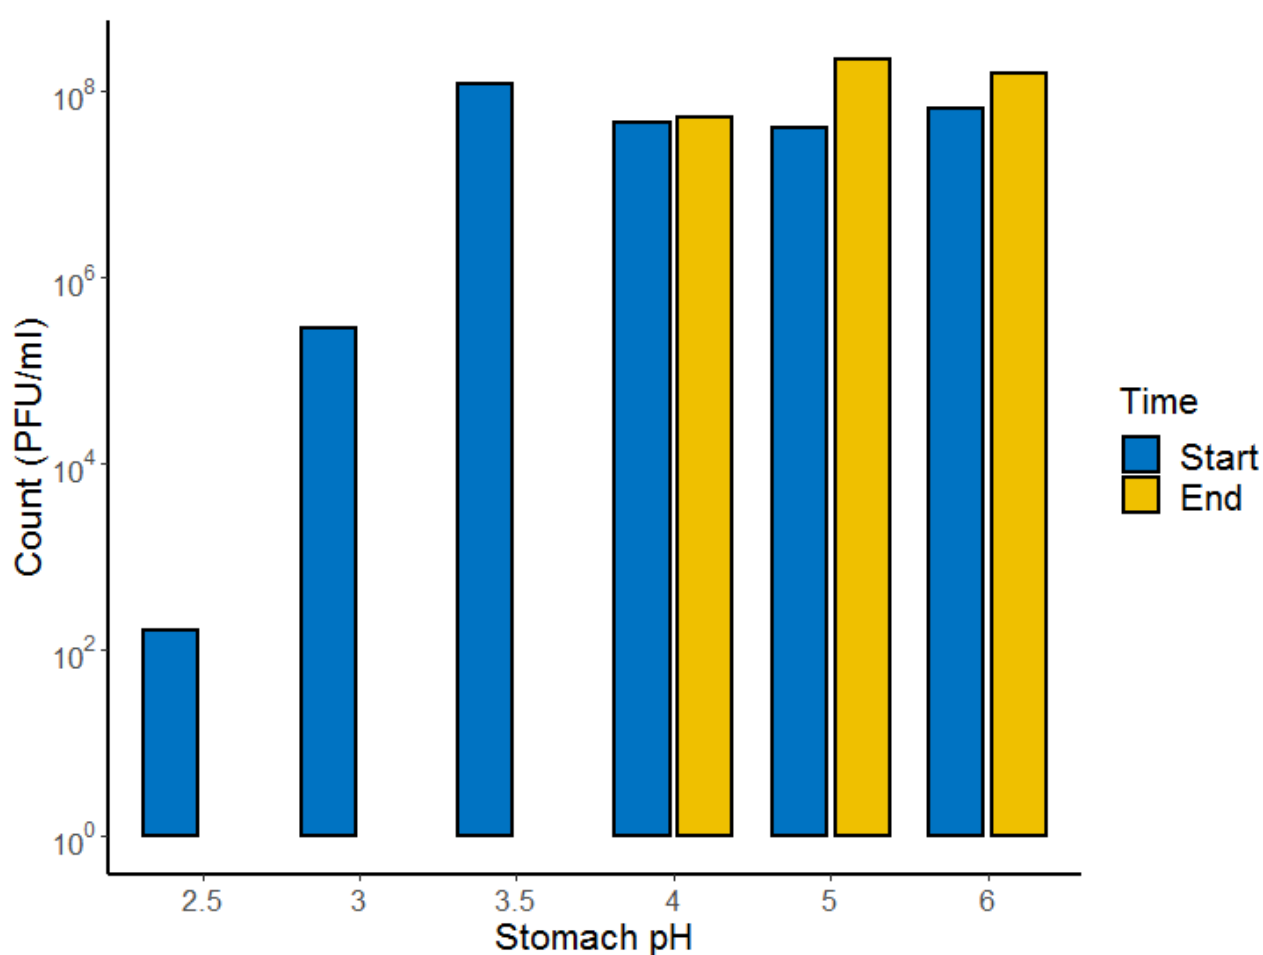

**Figure S1.** Phage survival by stomach step pH. Samples were collected at the beginning and of the stomach step and at the end of the ileum phase of the TSI simulation and plaque forming units were measured by plaque assay. All TSI simulations were run using standard parameters, apart from presence/absence of feed and pH adjustment. pH values of < 3 were performed without feed to simulated fasted conditions. Runs were performed in duplicate.

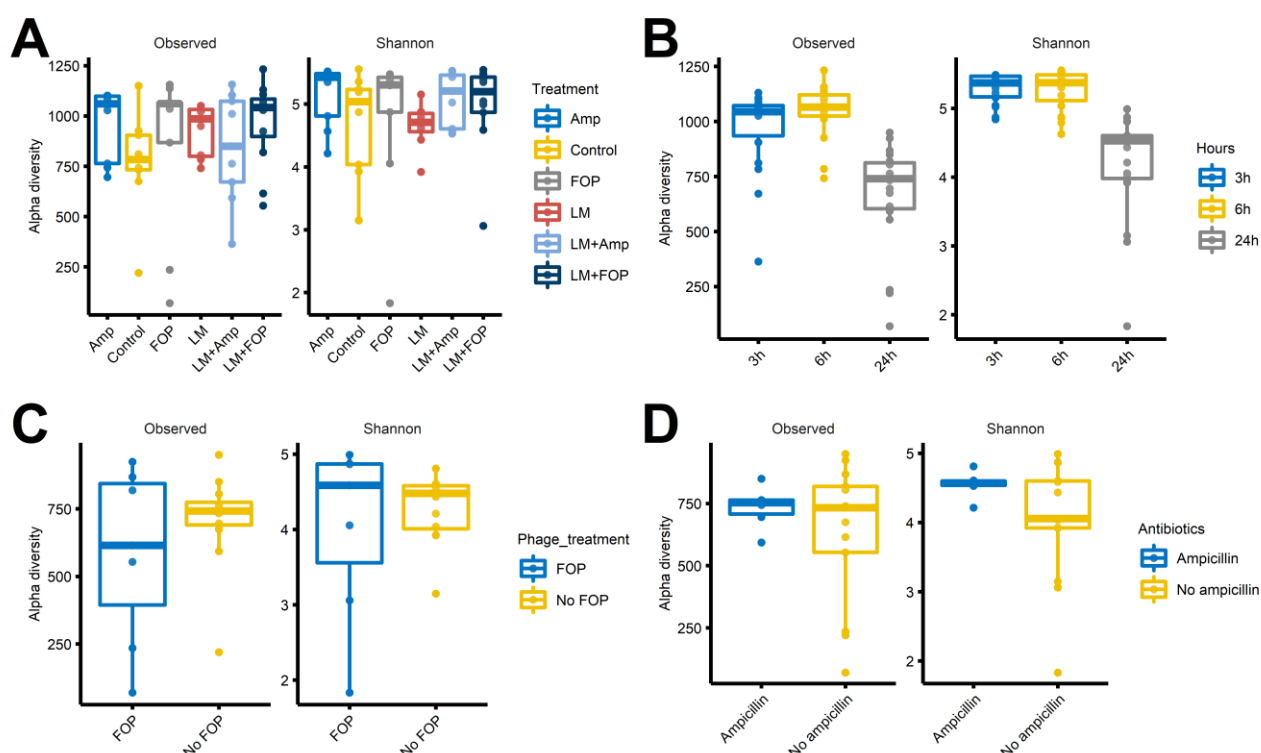

**Figure S2.** Bacterial alpha diversity measured by observed OTUs and Shannon diversity index, based on 16S rRNA sequencing. (A) Alpha diversity by treatment at 24 h. No significant difference. (B) Alpha diversity by time points. Both observed zOTUs and Shannon diversity index was significantly lower at 24 h ( $q < 0.0001$ ). (C) Alpha diversity by phage treatment at 24 h. No significant difference. (D) Alpha diversity by ampicillin treatment at 24 h. No significant difference. All significances were calculated using ANOVA with using Tukey's range test.

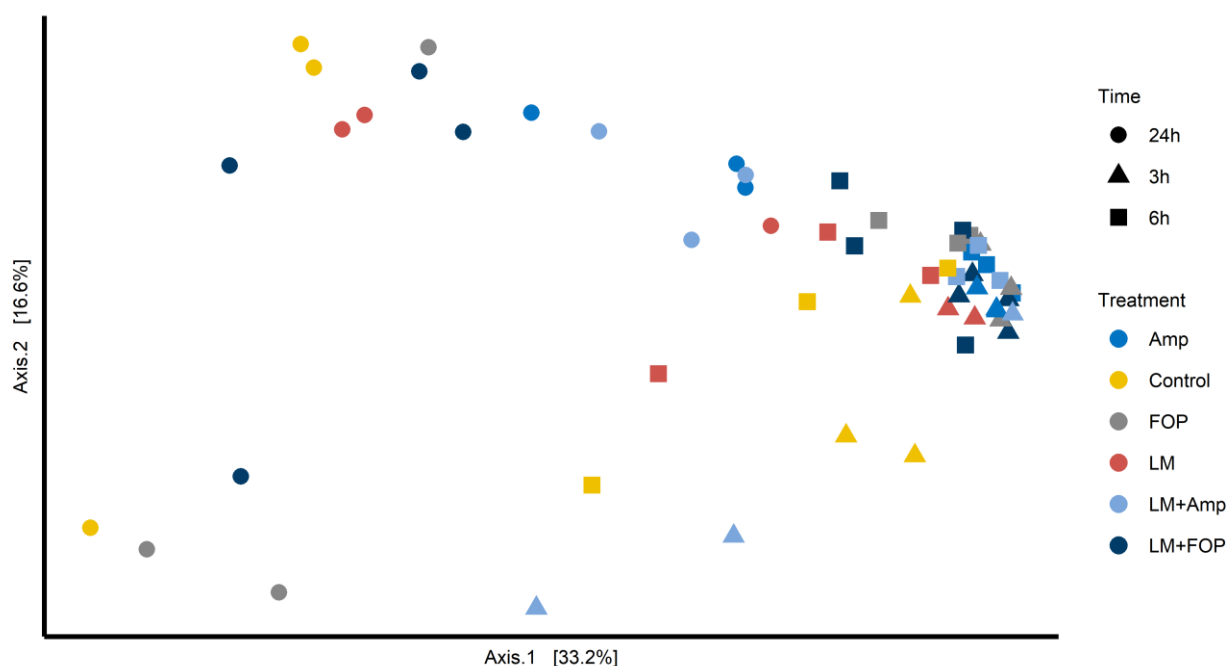

**Figure S3.** PCoA plot of Bray-Curtis dissimilarity distance for all time points and treatments. Bacteria and treatments were added to the CoMiniGut reactors followed by sampling at 3, 6 and 24 h, community composition was determined by 16S rRNA amplicon sequencing.

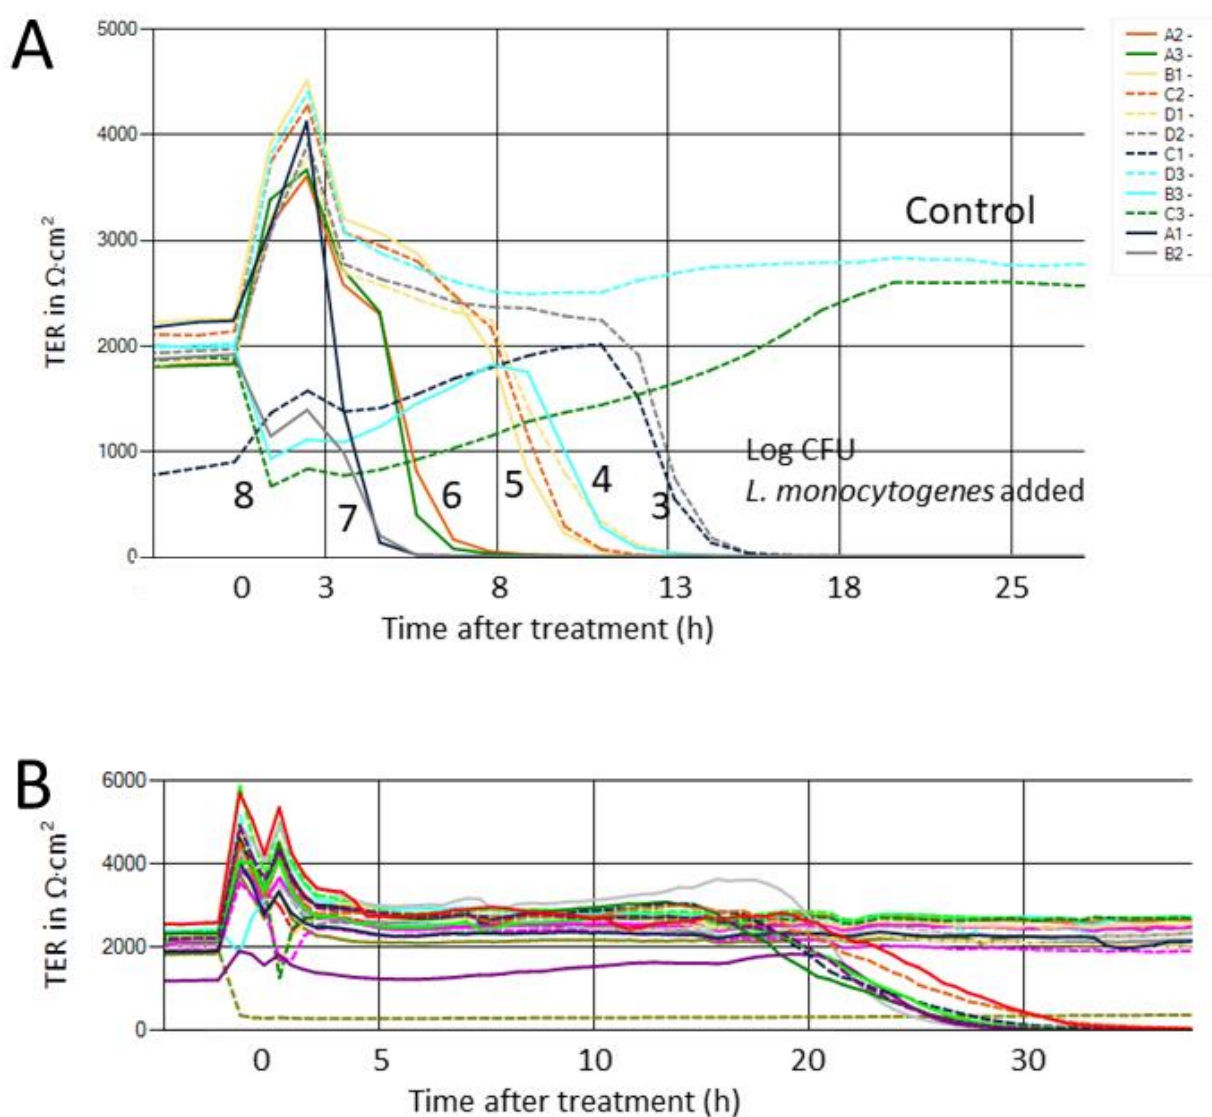

**Figure S4.** (A) Dosage effect of *L. monocytogenes* on trans-epithelial resistance (TER). Each set of colored lines represent a duplicate experiment with different concentrations of bacteria added. Numbers on graph denote log CFU *L. monocytogenes* added. Duplicate experiments were performed for each dose. (B) Effect of bacteriophage pre-treatment on trans-epithelial resistance (TER) after addition of HEPES buffer to stabilize pH.
